# Supplementary material for: A Proteome Reference Map of the Causative Agent of Melioidosis Burkholderia pseudomallei
Source: Hindawi journal article supplement (doi:10.1155/2011/530926), 2011-01-01
Supplement: f5 [file 530926.f5.pdf]

**Table S1.** Identification of proteins expressed in early stationary phase culture of *Burkholderia pseudomallei* by MALDI-TOF MS.

| Gene <sup>a</sup>                                                     | Spot number | Accession number | Locus in <i>B. pseudomallei</i> strain K96243 genome | % Seq coverage | Peptides matched | Score | Theo/exp pI | Theo/exp MW (kDa) | Virulence/Potential virulence <sup>b</sup> |
|-----------------------------------------------------------------------|-------------|------------------|------------------------------------------------------|----------------|------------------|-------|-------------|-------------------|--------------------------------------------|
| <b>Cell envelope biogenesis and outer membrane</b>                    |             |                  |                                                      |                |                  |       |             |                   |                                            |
| Exopolysaccharide biosynthesis related tyrosine-protein kinase (BceF) | 1           | YP_111834        | BPSS1830                                             | 12             | 9                | 65    | 6.61/4.74   | 79.3/39.3         | [1]                                        |
| UDP-N-acetylmuramoyl-tripeptide D-alanyl-D-alanine ligase (MurF)      | 2           | ZP_01324088      | BPSS1239                                             | 50             | 15               | 152   | 5.87/5.73   | 47.8/38.0         | [2]                                        |
| Porin related exported protein (OmpC)                                 | 3           | YP_111684        | BPSS1679                                             | 42             | 13               | 125   | 7.78/6.60   | 40.1/33.9         | [3]                                        |
| UDP-glucose 4-epimerase (GalE)                                        | 4           | YP_109266        | BPSS12670                                            | 54             | 19               | 223   | 6.17/6.63   | 37.2/36.2         | [4]                                        |
| D-alanyl-D-alanine carboxypeptidase (DAP)                             | 5           | ZP_00486077      | BPSS1239                                             | 36             | 9                | 91    | 10.64/4.90  | 35.6/50.0         | [5]                                        |
| D-alanine-D-alanine ligase B (DalB)                                   | 6           | YP_109619        | BPSS13023                                            | 59             | 14               | 184   | 5.26/5.13   | 33.5/31.1         |                                            |
| Outer membrane protein A (OmpA)                                       | 7           | YP_109118        | BPSS12522                                            | 45             | 18               | 173   | 9.51/4.29   | 24.3/23.8         | [6]                                        |
| Periplasmic/secreted protein                                          | 8           | ZP_01331873      | BPSS10972                                            | 61             | 20               | 217   | 8.20/6.28   | 23.1/21.1         |                                            |
| Acetyltransferase (GNAT) family protein (Gcn5)                        | 9           | YP_112313        | BPSS2310                                             | 34             | 7                | 81    | 9.72/4.73   | 20.1/45.4         |                                            |
| Phosphatidylethanolamine-binding protein                              | 10          | YP_107676        | BPSS1049                                             | 55             | 7                | 106   | 5.26/5.11   | 18.3/16.8         |                                            |
| Phosphatidylethanolamine-binding protein                              | 11          | YP_107676        | BPSS1049                                             | 47             | 7                | 106   | 5.26/4.72   | 18.3/13.7         |                                            |
| Metal-binding periplasmic protein                                     | 12          | YP_112008        | BPSS2003                                             | 65             | 8                | 134   | 9.16/6.02   | 17.8/20.0         |                                            |
| LysM/phospholipid-binding domain protein                              | 13          | YP_108071        | BPSS1449                                             | 38             | 5                | 78    | 4.54/4.54   | 16.4/16.4         |                                            |
| Exported protein surface antigen                                      | 14          | ZP_00895393      | BPSS2014                                             | 85             | 10               | 114   | 9.07/4.71   | 12.5/17.2         |                                            |
| <b>Energy metabolism</b>                                              |             |                  |                                                      |                |                  |       |             |                   |                                            |
| ATP synthase subunit B (AtpD)                                         | 15          | YP_109989        | BPSS13396                                            | 47             | 19               | 170   | 5.26/4.95   | 50.8/48.2         |                                            |
| ATP synthase subunit B (AtpD)                                         | 16          | YP_109989        | BPSS13396                                            | 36             | 12               | 118   | 5.26/5.08   | 50.8/48.4         |                                            |
| ATP synthase subunit B (AtpD)                                         | 17          | YP_109989        | BPSS13396                                            | 58             | 21               | 204   | 5.26/5.13   | 50.8/48.4         |                                            |
| ATP synthase subunit D (AtpH)                                         | 18          | YP_109992        | BPSS13399                                            | 58             | 11               | 130   | 5.30/5.17   | 19.0/16.4         |                                            |
| ATP synthase subunit epsilon (AtpC)                                   | 19          | YP_109988        | BPSS13395                                            | 46             | 5                | 75    | 5.11/5.08   | 14.9/15.8         |                                            |
| NADH-ubiquinone oxidoreductase subunit E (NuoE)                       | 20          | ZP_00440948      | BPSS1215                                             | 38             | 5                | 78    | 4.85/4.94   | 15.0/15.1         |                                            |
| NAD(P) transhydrogenase subunit alpha                                 | 21          | YP_109481        | BPSS2887                                             | 31             | 9                | 102   | 6.34/6.68   | 39.3/43.0         |                                            |
| Aldehyde dehydrogenase (NAD) family protein                           | 22          | ZP_00487209      | BPSS1550                                             | 64             | 24               | 251   | 5.46/5.55   | 50.7/49.1         |                                            |
| Aldehyde dehydrogenase (NAD) family protein                           | 23          | ZP_00487209      | BPSS1550                                             | 54             | 19               | 202   | 5.46/5.65   | 50.7/49.1         |                                            |
| Aldehyde dehydrogenase (NAD) family protein                           | 24          | ZP_00487209      | BPSS1550                                             | 66             | 26               | 275   | 5.46/5.86   | 50.7/49.2         |                                            |
| NAD-dependent aldehyde dehydrogenase                                  | 25          | ZP_00489836      | BPSS1354                                             | 39             | 18               | 167   | 5.50/5.18   | 52.4/45.2         |                                            |
| NADH dehydrogenase delta subunit (NuoD)                               | 26          | YP_107836        | BPSS1214                                             | 35             | 11               | 148   | 6.12/5.52   | 47.6/34.0         |                                            |
| Succinyl-CoA synthetase subunit beta (SucC)                           | 27          | YP_107404        | BPSS10779                                            | 19             | 8                | 77    | 5.25/4.67   | 41.4/45.6         |                                            |
| Succinate dehydrogenase catalytic subunit (SdhB)                      | 28          | YP_106305        | BPSS1717                                             | 65             | 23               | 211   | 6.00/6.46   | 27.4/30.5         |                                            |
| Malate dehydrogenase (Mdh)                                            | 29          | YP_106310        | BPSS1722                                             | 60             | 18               | 204   | 5.70/6.01   | 35.1/32.8         |                                            |
| Malate dehydrogenase (Mdh)                                            | 30          | YP_106310        | BPSS1722                                             | 56             | 18               | 208   | 5.70/4.46   | 35.1/32.2         |                                            |
| Electron transfer flavoprotein alpha-subunit (EtfA)                   | 31          | YP_109094        | BPSS2499                                             | 62             | 14               | 183   | 4.86/4.72   | 31.6/29.5         |                                            |
| Molybdopterin oxidoreductase                                          | 32          | YP_108802        | BPSS2207                                             | 25             | 21               | 139   | 8.76/4.96   | 86.4/32.8         |                                            |
| Ferredoxin-NADP reductase (Fpr)                                       | 33          | YP_106868        | BPSS0241                                             | 80             | 22               | 238   | 5.78/6.16   | 29.0/26.7         |                                            |
| Nitrotriacetate monooxygenase component A (NtaA)                      | 34          | YP_110863        | BPSS0851                                             | 42             | 15               | 166   | 8.94/5.38   | 48.0/26.2         |                                            |
| 2-nitropropane dioxygenase (Npd)                                      | 35          | ZP_00487498      | BPSS0328                                             | 40             | 6                | 116   | 5.79/6.24   | 33.9/29.4         |                                            |
| Phosphate acetyltransferase                                           | 36          | YP_111961        | BPSS1955                                             | 70             | 22               | 245   | 5.82/6.21   | 49.2/49.1         |                                            |
| Phosphate acetyltransferase                                           | 37          | YP_111961        | BPSS1955                                             | 29             | 10               | 145   | 5.82/6.31   | 49.2/29.1         |                                            |
| Inorganic pyrophosphatase (Ppa)                                       | 38          | YP_107649        | BPSS1021                                             | 72             | 23               | 304   | 5.37/5.25   | 19.2/21.0         | [7]                                        |
| Inorganic pyrophosphatase (Ppa)                                       | 39          | YP_107649        | BPSS1021                                             | 36             | 9                | 125   | 5.37/5.02   | 19.2/20.8         |                                            |
| Polyphosphate kinase 2 family (Ppk2)                                  | 40          | YP_335445        | BPSS1281                                             | 24             | 12               | 131   | 9.55/4.73   | 59.9/41.1         |                                            |
| <b>Carbohydrate metabolism</b>                                        |             |                  |                                                      |                |                  |       |             |                   |                                            |
| Carbohydrate porin, OprB family                                       | 41          | YP_104819        | BPSS0294                                             | 31             | 11               | 116   | 6.54/5.17   | 53.0/48.2         | [8]                                        |
| ABC-type sugar transport system                                       | 42          | YP_110795        | BPSS0786                                             | 32             | 9                | 107   | 8.82/4.74   | 35.9/31.5         |                                            |
| ABC-type sugar transport system                                       | 43          | ZP_00896510      | BPSS0787                                             | 24             | 8                | 88    | 8.48/4.63   | 55.3/28.0         |                                            |
| Phosphoglucomutase (Pgm)                                              | 44          | ZP_00490197      | BPSS2666                                             | 74             | 36               | 118   | 5.02/5.00   | 51.1/48.0         | [9]                                        |
| Phosphoglucomutase (Pgm)                                              | 45          | YP_109262        | BPSS2666                                             | 70             | 31               | 102   | 5.23/5.07   | 50.2/47.5         |                                            |
| Mannose-6-phosphate isomerase                                         | 46          | YP_335985        | BPSS1747                                             | 17             | 8                | 57    | 10.97/4.73  | 22.5/21.7         |                                            |
| Glyceraldehyde 3-phosphate dehydrogenase (GapA)                       | 47          | YP_109546        | BPSS2952                                             | 58             | 13               | 164   | 6.37/4.47   | 36.3/34.9         | [10]                                       |
| Glyceraldehyde 3-phosphate dehydrogenase (GapA)                       | 48          | YP_109546        | BPSS2952                                             | 85             | 25               | 282   | 6.37/6.70   | 36.3/37.0         |                                            |

Table S1. Continued

| Gene                                                                                  | Spot number | Accession number | Locus in <i>B. pseudomallei</i> strain K96243 genome | % Seq coverage | Peptides matched | Score | Theo/exp pl | Theo/exp MW (kDa) | Virulence/Potential virulence <sup>b</sup> |
|---------------------------------------------------------------------------------------|-------------|------------------|------------------------------------------------------|----------------|------------------|-------|-------------|-------------------|--------------------------------------------|
| Phosphoglycerate kinase (Pgk)                                                         | 49          | ZP_00895324      | BPSSL0796                                            | 61             | 21               | 245   | 5.58/5.72   | 41.4/43.7         | [11]                                       |
| Phosphoglycerate kinase (Pgk)                                                         | 50          | ZP_00895324      | BPSSL0796                                            | 50             | 21               | 242   | 5.58/5.18   | 41.4/28.9         |                                            |
| Phosphopyruvate hydratase (Eno)                                                       | 51          | YP_108866        | BPSSL2270                                            | 54             | 25               | 252   | 4.81/4.76   | 45.9/45.4         | [12]                                       |
| Phosphopyruvate hydratase (Eno)                                                       | 52          | YP_108866        | BPSSL2270                                            | 24             | 9                | 98    | 4.81/4.78   | 45.9/45.4         |                                            |
| Phosphogluconolactonase (Pgl)                                                         | 53          | ZP_01337223      | BPSSL2613                                            | 38             | 7                | 118   | 6.15/6.60   | 24.0/19.8         | [13]                                       |
| Trehalose-6-phosphatase (OstB)                                                        | 54          | ZP_00487870      | BPSSL2411                                            | 30             | 10               | 124   | 5.61/5.76   | 26.4/25.0         | [14]                                       |
| Methylisocitrate lyase (PrpB)                                                         | 55          | YP_106412        | BPSS0206                                             | 77             | 22               | 249   | 5.26/5.14   | 32.1/27.7         |                                            |
| Nucleoside-diphosphate-sugar epimerases                                               | 56          | YP_107886        | BPSSL1265                                            | 54             | 15               | 205   | 5.31/5.26   | 22.1/24.5         |                                            |
| Lipid metabolism                                                                      |             |                  |                                                      |                |                  |       |             |                   |                                            |
| Enoyl-CoA hydratase (PaaF)                                                            | 57          | YP_107280        | BPSSL0651                                            | 49             | 11               | 132   | 6.22/4.67   | 27.0/35.2         |                                            |
| Enoyl-CoA hydratase (PaaG)                                                            | 58          | YP_105309        | BPSSL3043                                            | 55             | 17               | 193   | 5.31/5.24   | 28.5/25.6         |                                            |
| Acetyl-CoA acetyltransferase (PhbA)                                                   | 59          | YP_108155        | BPSSL1535                                            | 45             | 20               | 204   | 6.62/6.06   | 40.7/33.0         |                                            |
| Fatty aldehyde dehydrogenase                                                          | 60          | YP_110058        | BPSS0034                                             | 39             | 16               | 154   | 6.19/6.58   | 55.1/64.3         |                                            |
| 3-hydroxyisobutyrate dehydrogenase (MmsB)                                             | 61          | ZP_00487155      | BPSS0620                                             | 39             | 11               | 114   | 5.77/6.11   | 29.1/28.2         |                                            |
| Succinyl-CoA:3-ketoacid-coenzyme A transferase subunit A (ScoA)                       | 62          | YP_108553        | BPSSL1955                                            | 50             | 11               | 143   | 5.56/5.89   | 25.4/25.2         |                                            |
| Succinyl-CoA:3-ketoacid-coenzyme A transferase subunit A (ScoA)                       | 63          | YP_108553        | BPSSL1955                                            | 34             | 9                | 106   | 5.56/5.34   | 25.4/24.6         |                                            |
| Succinyl-CoA:3-ketoacid-coenzyme A transferase subunit B (ScoB)                       | 64          | YP_108552        | BPSSL1954                                            | 46             | 12               | 126   | 4.70/4.78   | 22.3/23.9         |                                            |
| Acetoacetyl-CoA reductase (PhbB)                                                      | 65          | ZP_00490574      | BPSS1916                                             | 35             | 8                | 120   | 6.07/6.00   | 25.3/25.7         |                                            |
| Acetoacetyl-CoA reductase (PhbB)                                                      | 66          | YP_111922        | BPSS1916                                             | 64             | 21               | 213   | 6.30/6.54   | 26.6/24.8         |                                            |
| Acyl-CoA synthetases (AMP-forming)/AMP-acid ligases II (Acs)                          | 67          | ZP_01321975      | BPSS1274                                             | 35             | 12               | 129   | 6.84/5.14   | 47.2/37.1         |                                            |
| Acyl-carrier-protein S-malonyltransferase (FabD)                                      | 68          | YP_109033        | BPSSL2441                                            | 56             | 14               | 176   | 5.46/5.38   | 32.2/30.2         |                                            |
| Acyl-carrier-protein S-malonyltransferase                                             | 69          | YP_107960        | BPSSL1335                                            | 33             | 6                | 92    | 5.76/5.08   | 32.5/16.4         |                                            |
| Aryl alcohol dehydrogenase                                                            | 70          | ZP_01317539      | BPSSL1094                                            | 61             | 7                | 110   | 5.29/5.21   | 16.2/16.1         |                                            |
| 4-hydroxy-3-methylbut-2-enyl diphosphate reductase (IspH)                             | 71          | YP_107546        | BPSSL0919                                            | 63             | 20               | 215   | 5.71/6.02   | 35.4/37.6         |                                            |
| Carboxymuconolactone decarboxylase (PcaC)                                             | 72          | YP_332204        | BPSSL0589                                            | 45             | 8                | 119   | 9.80/5.34   | 22.9/22.7         |                                            |
| Non-ribosomally encoded peptide/polyketide synthase (CmaB)                            | 73          | YP_111196        | BPSS1183                                             | 57             | 21               | 247   | 5.77/6.19   | 35.6/34.8         |                                            |
| Amino acid metabolism                                                                 |             |                  |                                                      |                |                  |       |             |                   |                                            |
| Argininosuccinate synthase (ArgG)                                                     | 74          | YP_106925        | BPSSL0298                                            | 73             | 33               | 315   | 5.37/5.26   | 49.8/47.2         |                                            |
| Xaa-Pro aminopeptidase                                                                | 75          | ZP_00486035      | BPSSL2892                                            | 26             | 12               | 120   | 5.30/5.41   | 51.2/45.5         |                                            |
| Serine-pyruvate aminotransferase                                                      | 76          | ZP_01209494      | BPSS0343                                             | 32             | 8                | 101   | 6.30/4.76   | 32.6/40.5         |                                            |
| Phosphoserine aminotransferase (SerC)                                                 | 77          | YP_109115        | BPSSL2519                                            | 40             | 12               | 134   | 5.94/4.91   | 39.6/39.2         | [15]                                       |
| L-allo-threonine aldolase (ItaE)                                                      | 78          | YP_110255        | BPSS0236                                             | 27             | 8                | 109   | 5.65/6.00   | 35.9/35.5         |                                            |
| Diaminopimelate epimerase (DapF)                                                      | 79          | YP_440730        | BPSSL0210                                            | 47             | 12               | 150   | 5.58/5.68   | 31.2/29.0         |                                            |
| Cysteine synthase (CysM)                                                              | 80          | YP_109102        | BPSSL2507                                            | 61             | 18               | 202   | 5.68/5.87   | 32.7/31.6         |                                            |
| Imidazole glycerol phosphate synthase subunit (HisH)                                  | 81          | YP_109728        | BPSSL3135                                            | 37             | 7                | 94    | 5.73/6.45   | 23.7/25.7         |                                            |
| Imidazole glycerol phosphate synthase subunit (HisF)                                  | 82          | YP_109726        | BPSSL3133                                            | 58             | 23               | 225   | 5.44/5.17   | 27.7/25.0         |                                            |
| Phosphoribosyl formimino-5-aminoimidazole carboxamide ribonucleotide isomerase (HisA) | 83          | YP_109727        | BPSSL3134                                            | 70             | 21               | 204   | 4.37/4.38   | 26.8/26.5         |                                            |
| Tryptophan synthase subunit alpha (TrpA)                                              | 84          | YP_111702        | BPSS1697                                             | 71             | 18               | 212   | 5.30/5.19   | 28.0/26.5         |                                            |
| 3-dehydroquinate synthase (AroB)                                                      | 85          | YP_109761        | BPSSL3168                                            | 42             | 15               | 162   | 5.60/5.83   | 38.1/36.3         | [16]                                       |
| 2,3,4,5-tetrahydropyridine-2,6-dicarboxylate N-succinyltransferase (DapD)             | 86          | YP_108764        | BPSSL2169                                            | 37             | 10               | 125   | 5.68/6.00   | 29.7/30.5         |                                            |
| Nucleotide metabolism                                                                 |             |                  |                                                      |                |                  |       |             |                   |                                            |
| Pyrimidine regulatory protein (PyrR)                                                  | 87          | YP_109287        | BPSSL2691                                            | 56             | 6                | 118   | 5.61/5.64   | 18.1/16.4         |                                            |
| Orotidine 5'-phosphate decarboxylase (PyrF)                                           | 88          | YP_109557        | BPSSL2963                                            | 65             | 14               | 179   | 5.08/4.97   | 29.9/27.6         | [17]                                       |
| Dihydroorotate dehydrogenase (PyrD)                                                   | 89          | ZP_00488468      | BPSSL1866                                            | 50             | 11               | 142   | 8.38/4.67   | 34.7/39.5         | [18]                                       |
| Phosphoribosylaminoimidazole-succinocarboxamide synthase (HemH)                       | 90          | YP_107424        | BPSSL0799                                            | 58             | 19               | 216   | 5.23/5.17   | 32.9/32.7         | [19]                                       |
| Deoxyribose-phosphate aldolase (DeoC)                                                 | 91          | ZP_00489036      | BPSS1962                                             | 34             | 7                | 90    | 5.42/5.28   | 27.1/27.7         | [20]                                       |
| Deoxyribose-phosphate aldolase (DeoC)                                                 | 92          | YP_336226        | BPSS1962                                             | 87             | 20               | 249   | 5.42/5.53   | 27.2/27.2         |                                            |
| Nucleoside diphosphate kinase (Ndk)                                                   | 93          | YP_108130        | BPSSL1510                                            | 56             | 7                | 110   | 5.61/5.88   | 15.6/16.0         | [21]                                       |
| Thymidylate synthase                                                                  | 94          | YP_111119        | BPSS1106                                             | 34             | 11               | 99    | 6.37/4.91   | 37.4/37.8         | [22]                                       |

Table S1. Continued

| Gene                                                                | Spot number | Accession number | Locus in <i>B. pseudomallei</i> strain K96243 genome | % Seq coverage | Peptides matched | Score | Theo/exp pI | Theo/exp MW (kDa) | Virulence/Potential virulence <sup>b</sup> |
|---------------------------------------------------------------------|-------------|------------------|------------------------------------------------------|----------------|------------------|-------|-------------|-------------------|--------------------------------------------|
| Adenylate kinase (Adk)                                              | 95          | YP_107500        | BPSL0875                                             | 26             | 8                | 85    | 7.74/4.88   | 24.2/24.2         | [23]                                       |
| Adenylate cyclase                                                   | 96          | YP_110015        | BPSL3422                                             | 46             | 10               | 159   | 5.02/4.90   | 19.7/23.6         | [24]                                       |
| Coenzyme metabolism                                                 |             |                  |                                                      |                |                  |       |             |                   |                                            |
| ABC-type siderophores transport systems                             | 97          | ZP_00490149      | BPSL2723                                             | 44             | 12               | 155   | 6.67/6.58   | 28.6/27.2         |                                            |
| Molybdopterin biosynthesis protein                                  | 98          | YP_334335        | BPSL2480                                             | 41             | 8                | 120   | 5.46/5.37   | 22.3/24.2         |                                            |
| Phosphopantetheine adenylyltransferase (CoaD)                       | 99          | YP_107142        | BPSL0516                                             | 61             | 12               | 137   | 6.12/6.69   | 18.5/16.4         |                                            |
| Ketopantoate hydroxymethyltransferase (PanB)                        | 100         | YP_109419        | BPSL2824                                             | 61             | 12               | 136   | 5.58/5.67   | 28.8/27.3         |                                            |
| Riboflavin synthase subunit alpha (RibE)                            | 101         | YP_109221        | BPSL2625                                             | 76             | 12               | 145   | 5.49/5.54   | 21.7/21.1         |                                            |
| Pyridoxal phosphate biosynthetic protein (PdxJ)                     | 102         | YP_334273        | BPSL2426                                             | 54             | 10               | 132   | 5.78/6.20   | 27.7/29.4         |                                            |
| Secondary metabolite metabolism                                     |             |                  |                                                      |                |                  |       |             |                   |                                            |
| Cytochrome P450                                                     | 103         | ZP_00440831      | BPSS0023                                             | 36             | 17               | 169   | 9.13/4.80   | 44.8/50.0         |                                            |
| Cytochrome P450                                                     | 104         | ZP_00486588      | BPSS0023                                             | 29             | 11               | 123   | 9.13/5.24   | 44.8/48.3         |                                            |
| cis-diol dehydrogenase (BenD)                                       | 105         | YP_111912        | BPSS1906                                             | 43             | 12               | 157   | 6.66/4.95   | 27.5/27.7         |                                            |
| Benzoate 1,2-dioxygenase hydroxylase component, beta subunit (BenB) | 106         | ZP_00490585      | BPSS1904                                             | 68             | 10               | 150   | 5.13/4.70   | 19.2/15.1         |                                            |
| Inorganic ion metabolism                                            |             |                  |                                                      |                |                  |       |             |                   |                                            |
| Sulfite reductase, beta subunit                                     | 107         | ZP_00487414      | BPSL1319                                             | 41             | 28               | 208   | 6.75/4.92   | 67.6/53.1         |                                            |
| Rhodanese-related sulfurtransferase                                 | 108         | YP_105132        | BPSS1766                                             | 57             | 17               | 169   | 5.98/6.36   | 31.1/28.9         |                                            |
| Phosphonate metabolism protein (PhnI)                               | 109         | YP_334725        | BPSL2855                                             | 31             | 13               | 114   | 5.15/4.73   | 43.5/23.0         |                                            |
| ABC-type phosphate/phosphonate transport system (PhnC)              | 110         | ZP_01320985      | BPSL2850                                             | 43             | 7                | 93    | 11.58/4.81  | 24.6/32.0         |                                            |
| ABC-type organic solvent resistance                                 | 111         | ZP_00892628      | BPSL3150                                             | 40             | 8                | 100   | 5.83/5.93   | 29.4/34.4         |                                            |
| DNA replication, recombination and repair                           |             |                  |                                                      |                |                  |       |             |                   |                                            |
| Replicative DNA helicase (DnaB)                                     | 112         | ZP_01337384      | BPSL1462                                             | 30             | 11               | 110   | 9.04/4.91   | 41.9/38.5         |                                            |
| Single-strand DNA-binding protein (Ssb)                             | 113         | YP_107172        | BPSL0547                                             | 55             | 9                | 138   | 5.51/5.68   | 18.7/20.1         |                                            |
| Mg-dependent DNase                                                  | 114         | ZP_00895143      | BPSL1439                                             | 29             | 7                | 87    | 6.16/5.73   | 30.6/49.5         |                                            |
| Integrase core domain protein                                       | 115         | YP_001074590     | BPSS0407                                             | 68             | 11               | 122   | 11.22/4.92  | 21.1/19.9         |                                            |
| Transcription                                                       |             |                  |                                                      |                |                  |       |             |                   |                                            |
| DNA-directed RNA polymerase alpha subunit (RpoA)                    | 116         | YP_109781        | BPSL3187                                             | 72             | 28               | 297   | 5.76/6.09   | 35.8/42.0         |                                            |
| Transcription initiation factor                                     | 117         | YP_111848        | BPSS1844                                             | 42             | 6                | 76    | 5.04/4.95   | 13.1/13.9         |                                            |
| Transcription elongation factor (GreA)                              | 118         | YP_107977        | BPSL1352                                             | 92             | 15               | 228   | 4.50/4.48   | 17.0/18.2         |                                            |
| Sigma-54 interacting transcriptional regulator                      | 119         | YP_112253        | BPSL2250                                             | 34             | 14               | 139   | 9.57/4.95   | 35.9/32.2         |                                            |
| Phage shock protein A                                               | 120         | YP_108702        | BPSL2105                                             | 62             | 20               | 166   | 5.11/4.97   | 24.5/25.9         |                                            |
| Phage shock protein A                                               | 121         | YP_108702        | BPSL2105                                             | 52             | 12               | 147   | 5.11/4.92   | 24.5/26.0         |                                            |
| LysR-family transcriptional regulator                               | 122         | YP_108192        | BPSL1572                                             | 27             | 6                | 76    | 6.72/5.72   | 31.6/45.8         |                                            |
| IcIR regulatory protein                                             | 123         | YP_108891        | BPSL2295                                             | 56             | 19               | 199   | 8.45/4.91   | 29.9/28.0         |                                            |
| Transcriptional regulator, ArsR family                              | 124         | YP_336380        | BPSS2119                                             | 47             | 7                | 111   | 5.75/4.89   | 24.7/35.5         |                                            |
| Response regulator with putative antiterminator output domain       | 125         | ZP_00486070      | BPSS1246                                             | 46             | 17               | 160   | 5.24/5.14   | 22.1/23.7         |                                            |
| Transcriptional regulator, XRE family                               | 126         | YP_104861        | BPSS0004                                             | 47             | 15               | 157   | 9.00/5.39   | 21.7/23.5         |                                            |
| AsnC-family regulatory protein                                      | 127         | YP_107935        | BPSL1311                                             | 65             | 15               | 213   | 6.74/6.53   | 18.2/28.1         |                                            |
| Transcriptional regulator                                           | 128         | ZP_00894941      | BPSL1269                                             | 34             | 5                | 70    | 6.74/5.02   | 16.2/11.8         |                                            |
| DksA family protein                                                 | 129         | YP_106833        | BPSL0205                                             | 83             | 14               | 191   | 5.26/5.13   | 16.1/16.4         |                                            |
| Nucleoside diphosphate kinase regulator                             | 130         | YP_110889        | BPSS0880                                             | 91             | 16               | 190   | 5.04/5.04   | 15.3/16.0         |                                            |
| Transcriptional activator (FlhD)                                    | 131         | YP_109907        | BPSL3311                                             | 54             | 6                | 74    | 5.85/4.95   | 11.7/17.0         | [25]                                       |
| DNA-binding protein HU-alpha (HupA)                                 | 132         | YP_106629        | BPSL0004                                             | 80             | 10               | 158   | 10.20/4.48  | 9.60/13.1         |                                            |
| Translation                                                         |             |                  |                                                      |                |                  |       |             |                   |                                            |

Table S1. Continued

| Gene                                                           | Spot number | Accession number | Locus in <i>B. pseudomallei</i> strain K96243 genome | % Seq coverage | Peptides matched | Score | Theo/exp pI | Theo/exp MW (kDa) | Virulence/Potential virulence <sup>b</sup> |
|----------------------------------------------------------------|-------------|------------------|------------------------------------------------------|----------------|------------------|-------|-------------|-------------------|--------------------------------------------|
| tRNA nucleotidyltransferase (cca)                              | 133         | YP_106892        | BPSSL0265                                            | 45             | 14               | 159   | 7.25/4.76   | 45.2/34.5         |                                            |
| tRNA nucleotidyltransferase (cca)                              | 134         | YP_106892        | BPSSL0265                                            | 44             | 12               | 139   | 7.25/5.23   | 45.2/38.0         |                                            |
| Elongation factor Tu (Tuf)                                     | 135         | YP_109809        | BPSSL3215                                            | 54             | 18               | 189   | 5.36/4.97   | 43.2/45.4         | [26]                                       |
| Elongation factor Tu (Tuf)                                     | 136         | YP_109809        | BPSSL3215                                            | 50             | 15               | 143   | 5.36/4.10   | 43.2/44.2         |                                            |
| Elongation factor Tu (Tuf)                                     | 137         | YP_109809        | BPSSL3215                                            | 53             | 18               | 174   | 5.36/4.16   | 43.2/45.3         |                                            |
| Elongation factor Tu (Tuf)                                     | 138         | YP_109809        | BPSSL3215                                            | 67             | 24               | 209   | 5.36/4.68   | 43.2/44.3         |                                            |
| Elongation factor Tu (Tuf)                                     | 139         | YP_109809        | BPSSL3215                                            | 42             | 13               | 131   | 5.36/4.93   | 43.2/46.6         |                                            |
| Elongation factor Tu (Tuf)                                     | 140         | ZP_01320582      | BPSSL3215                                            | 35             | 9                | 139   | 5.18/4.94   | 40.3/38.6         |                                            |
| Elongation factor Ts (Tsf)                                     | 141         | YP_108753        | BPSSL2158                                            | 72             | 25               | 246   | 5.38/5.19   | 31.3/30.9         |                                            |
| Elongation factor Ts (Tsf)                                     | 142         | YP_108753        | BPSSL2158                                            | 59             | 21               | 216   | 5.38/5.08   | 31.3/31.4         |                                            |
| GTP-binding GTPase (YchF)                                      | 143         | YP_105289        | BPSSL3062                                            | 64             | 21               | 251   | 4.98/4.96   | 39.4/46.6         | [27]                                       |
| 30S ribosomal protein S2 (RpsB)                                | 144         | YP_108754        | BPSSL2159                                            | 84             | 27               | 241   | 7.90/4.23   | 27.1/30.2         |                                            |
| 30S ribosomal protein S3 (RpsC)                                | 145         | YP_109801        | BPSSL3027                                            | 39             | 8                | 89    | 10.56/4.95  | 29.9/35.2         |                                            |
| 30S ribosomal protein S4 (RpsD)                                | 146         | YP_109782        | BPSSL3188                                            | 38             | 10               | 125   | 10.13/6.06  | 23.2/22.8         |                                            |
| 30S ribosomal protein S5 (RpsE)                                | 147         | ZP_00439647      | BPSSL3196                                            | 75             | 18               | 183   | 10.41/4.28  | 15.8/17.7         |                                            |
| 30S ribosomal protein S9 (RpsI)                                | 148         | YP_103901        | BPSSL2910                                            | 66             | 6                | 121   | 10.65/4.13  | 14.3/16.0         |                                            |
| 30S ribosomal protein S9 (RpsI)                                | 149         | YP_103901        | BPSSL2910                                            | 66             | 10               | 98    | 10.65/4.27  | 14.3/16.0         |                                            |
| 50S ribosomal protein L3 (RplC)                                | 150         | YP_109807        | BPSSL3213                                            | 63             | 15               | 181   | 9.99/4.24   | 23.0/24.5         |                                            |
| 50S ribosomal protein L4 (RplD)                                | 151         | YP_109806        | BPSSL3212                                            | 53             | 8                | 143   | 9.62/4.91   | 22.9/22.4         |                                            |
| 50S ribosomal protein L4 (RplD)                                | 152         | YP_109806        | BPSSL3212                                            | 66             | 11               | 149   | 9.62/5.02   | 22.9/22.3         |                                            |
| 50S ribosomal protein L6 (RplF)                                | 153         | YP_109792        | BPSSL3198                                            | 86             | 16               | 207   | 9.63/4.55   | 18.7/18.0         |                                            |
| 50S ribosomal protein L7/L12                                   | 154         | YP_104175        | BPSSL3222                                            | 81             | 9                | 135   | 4.90/4.90   | 12.6/12.6         |                                            |
| 2-methylthioadenine synthetase                                 | 155         | YP_108158        | BPSSL1538                                            | 35             | 12               | 129   | 5.87/4.69   | 50.1/31.5         |                                            |
| Post-translational modification                                |             |                  |                                                      |                |                  |       |             |                   |                                            |
| Molecular chaperone (DnaK)                                     | 156         | YP_109422        | BPSSL2827                                            | 39             | 22               | 121   | 4.94/4.93   | 69.8/80.0         | [28]                                       |
| Chaperonin GroEL                                               | 157         | AAO46033         | BPSSL2697                                            | 67             | 41               | 121   | 5.18/4.95   | 56.5/57.2         | [29]                                       |
| Chaperonin GroEL                                               | 158         | AAO46033         | BPSSL2697                                            | 80             | 44               | 147   | 5.18/4.97   | 56.5/56.5         |                                            |
| Chaperonin GroEL                                               | 159         | AAO46033         | BPSSL2697                                            | 77             | 46               | 166   | 5.18/5.00   | 56.5/56.5         |                                            |
| Chaperonin GroEL                                               | 160         | AAO46033         | BPSSL2697                                            | 77             | 40               | 126   | 5.18/5.06   | 56.5/55.4         |                                            |
| Chaperonin GroES                                               | 161         | YP_109294        | BPSSL2698                                            | 91             | 11               | 169   | 5.78/5.21   | 10.5/14.9         |                                            |
| Chaperonin GroES                                               | 162         | YP_109294        | BPSSL2698                                            | 77             | 11               | 154   | 5.78/4.97   | 10.5/13.8         |                                            |
| Chaperonin GroES                                               | 163         | YP_109294        | BPSSL2698                                            | 72             | 8                | 122   | 5.78/4.97   | 10.5/14.7         |                                            |
| Chaperonin GroES                                               | 164         | YP_109294        | BPSSL2698                                            | 72             | 8                | 122   | 5.78/6.00   | 10.5/14.9         |                                            |
| Heat shock Hsp20-related protein                               | 165         | YP_109511        | BPSSL2917                                            | 57             | 5                | 81    | 6.30/6.51   | 15.2/19.7         |                                            |
| HSP20/alpha crystallin family protein                          | 166         | YP_112291        | BPSS2288                                             | 76             | 9                | 145   | 5.14/5.00   | 16.0/15.8         |                                            |
| HSP20/alpha crystallin family protein                          | 167         | YP_112291        | BPSS2288                                             | 60             | 5                | 99    | 5.14/4.78   | 16.0/15.9         |                                            |
| HSP20/alpha crystallin family protein                          | 168         | YP_112291        | BPSS2288                                             | 76             | 9                | 148   | 5.14/5.00   | 16.0/16.3         |                                            |
| GrpE heat shock protein                                        | 169         | YP_109423        | BPSSL2829                                            | 42             | 9                | 124   | 4.78/4.27   | 19.7/22.5         |                                            |
| Peptidyl-prolyl cis-trans isomerase, cyclophilin family (PpiA) | 170         | ZP_00487969      | BPSSL2245                                            | 50             | 14               | 165   | 9.49/6.59   | 20.4/18.9         | [30]                                       |
| Peptidyl-prolyl cis-trans isomerase B (PpiB)                   | 171         | ZP_01322808      | BPSSL2246                                            | 45             | 8                | 92    | 6.20/6.02   | 15.6/19.1         |                                            |
| Peptidyl-prolyl cis-trans isomerase B (PpiB)                   | 172         | YP_108841        | BPSSL2246                                            | 68             | 18               | 210   | 5.94/6.39   | 17.9/19.2         |                                            |
| Peptidyl-prolyl cis-trans isomerase B (PpiB)                   | 173         | YP_108841        | BPSSL2246                                            | 65             | 12               | 161   | 5.94/6.55   | 17.9/19.4         |                                            |
| Peptidyl-prolyl cis-trans isomerase B (PpiB)                   | 174         | YP_108841        | BPSSL2246                                            | 69             | 16               | 210   | 5.94/6.28   | 17.9/19.5         |                                            |
| Peptidyl-prolyl cis-trans isomerase B (PpiB)                   | 175         | YP_108841        | BPSSL2246                                            | 69             | 16               | 194   | 5.94/6.18   | 17.9/19.2         |                                            |
| Glutathione S-transferase                                      | 176         | YP_108349        | BPSSL1749                                            | 50             | 9                | 120   | 6.99/6.67   | 26.7/28.9         |                                            |
| Glutathione S-transferase                                      | 177         | YP_108349        | BPSSL1749                                            | 38             | 9                | 104   | 6.99/6.53   | 26.7/22.9         |                                            |
| Glutaredoxin-related protein                                   | 178         | YP_105273        | BPSSL3075                                            | 48             | 5                | 81    | 4.68/4.74   | 11.6/12.6         |                                            |
| Thioredoxin                                                    | 179         | ZP_00487706      | BPSSL0856                                            | 71             | 18               | 233   | 4.59/4.55   | 31.2/29.4         |                                            |
| Thioredoxin 1 (TrxA)                                           | 180         | YP_333769        | BPSSL1497                                            | 63             | 10               | 129   | 8.83/6.06   | 16.0/15.8         | [31]                                       |
| Thiol peroxidase (Tpx)                                         | 181         | YP_109581        | BPSSL2987                                            | 97             | 15               | 235   | 5.12/5.02   | 17.4/17.9         | [32]                                       |
| ATP-dependent Clp protease ATP-binding subunit (ClpA)          | 182         | ZP_01335014      | BPSSL0899                                            | 41             | 14               | 157   | 6.02/4.78   | 35.7/29.0         | [33]                                       |
| Leucyl/phenylalanyl-tRNA protein transferase                   | 183         | YP_111202        | BPSS1192                                             | 31             | 10               | 84    | 6.36/4.92   | 47.0/49.6         |                                            |
| Protein-L-isoaspartate O-methyltransferase (Pcm)               | 184         | YP_109244        | BPSSL2648                                            | 75             | 18               | 216   | 5.55/5.57   | 24.1/24.9         |                                            |
| Xanthine and CO dehydrogenases                                 | 185         | ZP_00486866      | BPSSL0237                                            | 22             | 7                | 102   | 5.68/4.92   | 36.7/27.1         |                                            |

Table S1. Continued

| Gene                                                            | Spot number | Accession number | Locus in <i>B. pseudomallei</i> strain K96243 genome | % Seq coverage | Peptides matched | Score | Theo/exp pI | Theo/exp MW (kDa) | Virulence/Potential virulence <sup>b</sup> |
|-----------------------------------------------------------------|-------------|------------------|------------------------------------------------------|----------------|------------------|-------|-------------|-------------------|--------------------------------------------|
| Cell motility, intracellular trafficking and secretion          |             |                  |                                                      |                |                  |       |             |                   |                                            |
| O-linked N-acetylglucosamine transferase                        | 186         | ZP_01325544      | BPSL0525                                             | 48             | 26               | 184   | 5.75/5.16   | 63.7/63.6         |                                            |
| O-linked N-acetylglucosamine transferase                        | 187         | ZP_01325544      | BPSL0525                                             | 57             | 34               | 115   | 5.75/5.25   | 63.7/63.4         |                                            |
| Flagellar biosynthesis/type III secretory pathway ATPase (FliI) | 188         | ZP_00489093      | BPSL0227                                             | 29             | 11               | 115   | 6.53/6.02   | 44.3/46.2         | [34]                                       |
| Type III secretion protein (HrpB1/HrpK)                         | 189         | YP_111411        | BPSS1399                                             | 46             | 6                | 84    | 4.73/4.94   | 21.0/40.7         |                                            |
| Type III secretion chaperone LcrH/SycD (BicA)                   | 190         | YP_335732        | BPSS1533                                             | 68             | 7                | 122   | 4.88/6.00   | 18.8/16.0         | [35]                                       |
| BsaU protein (BsaU)                                             | 191         | ZP_01214210      | BPSS1539                                             | 65             | 14               | 134   | 10.17/4.83  | 18.0/17.3         |                                            |
| BipB protein (BipB)                                             | 192         | YP_106121        | BPSS1532                                             | 28             | 23               | 88    | 6.03/6.46   | 64.9/67.4         | [36]                                       |
| Type III secretion system protein (BsaR)                        | 193         | YP_111548        | BPSS1542                                             | 36             | 4                | 69    | 4.61/4.49   | 15.2/14.1         |                                            |
| Type III effector protein (BipD)                                | 194         | YP_111535        | BPSS1529                                             | 53             | 11               | 182   | 5.13/4.95   | 34.0/30.0         | [37]                                       |
| Type III/IV secretion system protein                            | 195         | ZP_01249703      | BPSL3008                                             | 43             | 14               | 160   | 8.46/4.38   | 43.6/32.6         |                                            |
| Type III/IV secretion system protein (PilQ)                     | 196         | ZP_01330258      | BPSS1597                                             | 45             | 25               | 204   | 6.27/6.53   | 58.8/30.3         | [38]                                       |
| Flp pilus assembly protein                                      | 197         | ZP_01333163      | BPSL1896                                             | 36             | 7                | 91    | 9.58/5.18   | 30.0/24.3         |                                            |
| Export protein translocase (SecB)                               | 198         | YP_107071        | BPSL0446                                             | 92             | 9                | 181   | 4.56/4.46   | 17.8/19.3         | [39]                                       |
| TadE-like protein                                               | 199         | YP_001064080     | BPSS2194                                             | 70             | 7                | 97    | 9.15/5.33   | 16.4/16.1         |                                            |
| Chemotaxis protein CheW                                         | 200         | ZP_01335516      | BPSL3305                                             | 46             | 6                | 97    | 4.99/5.05   | 16.9/13.9         |                                            |
| Chemotaxis protein CheW                                         | 201         | ZP_01335516      | BPSL3305                                             | 54             | 8                | 115   | 4.99/4.99   | 16.9/13.9         |                                            |
| Cell cycle and division                                         |             |                  |                                                      |                |                  |       |             |                   |                                            |
| Segregation and condensation protein B (ScpB)                   | 202         | YP_333310        | BPSL1922                                             | 32             | 12               | 130   | 4.46/4.16   | 47.9/44.1         |                                            |
| Cell division protein (FtsZ)                                    | 203         | YP_109616        | BPSL3020                                             | 72             | 24               | 241   | 4.87/4.90   | 41.7/43.3         |                                            |
| Nucleotide-binding protein (Maf)                                | 204         | YP_107781        | BPSL1159                                             | 46             | 8                | 110   | 5.39/5.44   | 22.0/23.9         |                                            |
| Cobyrinic acid a,c-diamide synthase                             | 205         | YP_107617        | BPSL0989                                             | 47             | 8                | 126   | 6.08/6.52   | 22.6/24.2         |                                            |
| Stress responses                                                |             |                  |                                                      |                |                  |       |             |                   |                                            |
| Universal stress protein family                                 | 206         | YP_335264        | BPSS1140                                             | 70             | 17               | 197   | 5.26/5.36   | 34.4/33.3         |                                            |
| Universal stress protein family                                 | 207         | YP_105446        | BPSS0839                                             | 61             | 20               | 224   | 5.79/6.24   | 30.4/30.4         |                                            |
| Universal stress protein family                                 | 208         | YP_104889        | BPSS0032                                             | 65             | 10               | 154   | 5.78/6.12   | 16.6/16.1         |                                            |
| Universal stress protein family                                 | 209         | YP_104981        | BPSS1934                                             | 47             | 6                | 111   | 6.51/5.26   | 16.8/16.0         |                                            |
| Universal stress protein family                                 | 210         | YP_105445        | BPSS0838                                             | 45             | 7                | 74    | 5.95/5.28   | 17.6/17.4         |                                            |
| Universal stress protein family                                 | 211         | ZP_00490462      | BPSS0836                                             | 70             | 9                | 101   | 5.21/4.96   | 16.5/16.3         |                                            |
| Phasin (PhaP)                                                   | 212         | YP_108894        | BPSL2298                                             | 92             | 20               | 259   | 5.96/5.66   | 19.9/23.5         |                                            |
| Phasin (PhaP)                                                   | 213         | YP_108894        | BPSL2298                                             | 88             | 17               | 214   | 5.96/5.86   | 19.9/23.6         |                                            |
| Phasin (PhaP)                                                   | 214         | YP_108894        | BPSL2298                                             | 91             | 18               | 231   | 5.96/6.30   | 19.9/23.5         |                                            |
| Phasin (PhaP)                                                   | 215         | YP_108894        | BPSL2298                                             | 59             | 9                | 159   | 5.96/5.13   | 19.9/15.4         |                                            |
| Phasin (PhaP)                                                   | 216         | YP_108894        | BPSL2298                                             | 73             | 15               | 174   | 5.96/4.97   | 19.9/15.2         |                                            |
| Phasin (PhaP)                                                   | 217         | YP_108894        | BPSL2298                                             | 74             | 11               | 196   | 5.96/4.90   | 19.9/15.3         |                                            |
| Phasin (PhaP)                                                   | 218         | YP_108894        | BPSL2298                                             | 75             | 13               | 183   | 5.96/4.92   | 19.9/16.7         |                                            |
| Phasin (PhaP)                                                   | 219         | YP_108894        | BPSL2298                                             | 73             | 14               | 185   | 5.96/4.92   | 19.9/16.3         |                                            |
| Phasin (PhaP)                                                   | 220         | YP_108894        | BPSL2298                                             | 50             | 7                | 127   | 5.96/4.79   | 19.9/14.5         |                                            |
| Alkyl hydroperoxide reductase                                   | 221         | ZP_00488820      | BPSL2096                                             | 68             | 12               | 179   | 5.02/4.94   | 19.1/18.1         |                                            |
| Alkyl hydroperoxide reductase                                   | 222         | ZP_00488820      | BPSL2096                                             | 46             | 9                | 130   | 5.02/4.76   | 19.1/18.3         |                                            |
| Alkyl hydroperoxide reductase                                   | 223         | ZP_00488820      | BPSL2096                                             | 50             | 7                | 104   | 5.02/4.70   | 19.1/13.3         |                                            |
| Alkyl hydroperoxide reductase D                                 | 224         | YP_108694        | BPSL2097                                             | 62             | 13               | 170   | 6.30/6.51   | 18.8/16.7         |                                            |
| Oxidoreductase                                                  | 225         | YP_109344        | BPSL2748                                             | 54             | 11               | 132   | 5.75/6.19   | 23.9/24.6         |                                            |
| Oxidoreductase                                                  | 226         | YP_109344        | BPSL2748                                             | 50             | 8                | 111   | 5.75/5.95   | 23.9/24.7         |                                            |
| Oxidoreductase                                                  | 227         | YP_109344        | BPSL2748                                             | 33             | 6                | 81    | 5.75/6.32   | 23.9/20.5         |                                            |
| Organic hydroperoxide resistance protein (Ohr)                  | 228         | YP_111786        | BPSS1782                                             | 59             | 6                | 90    | 6.28/6.63   | 14.5/16.2         |                                            |
| Glyoxalase I                                                    | 229         | YP_110250        | BPSS0230                                             | 74             | 9                | 197   | 5.75/6.11   | 14.8/15.4         |                                            |
| Glyoxalase I                                                    | 230         | ZP_00485646      | BPSS0230                                             | 82             | 10               | 157   | 5.77/5.58   | 14.7/16.1         |                                            |
| Osmotically inducible Y domain protein                          | 231         | YP_336221        | BPSS1958                                             | 32             | 7                | 90    | 5.35/5.34   | 23.5/24.6         |                                            |
| Osmotically inducible Y domain protein                          | 232         | YP_336183        | BPSS1924                                             | 40             | 9                | 129   | 5.68/5.28   | 20.9/23.1         |                                            |

Table S1. Continued

| Gene                                             | Spot number | Accession number | Locus in <i>B. pseudomallei</i> strain K96243 genome | % Seq coverage | Peptides matched | Score | Theo/exp pI | Theo/exp MW (kDa) | Virulence/Potential virulence <sup>b</sup> |
|--------------------------------------------------|-------------|------------------|------------------------------------------------------|----------------|------------------|-------|-------------|-------------------|--------------------------------------------|
| Osmotically inducible Y domain protein           | 233         | YP_336183        | BPSS1924                                             | 31             | 5                | 88    | 5.68/5.17   | 20.9/23.1         | [40]                                       |
| Multidrug efflux pump (AmrA)                     | 234         | YP_108403        | BPSL1804                                             | 43             | 21               | 167   | 9.62/5.08   | 42.5/33.2         |                                            |
| Multidrug efflux pump (AmrA)                     | 235         | YP_108403        | BPSL1804                                             | 23             | 10               | 81    | 9.62/4.67   | 42.5/32.6         |                                            |
| Bacterioferritin antioxidant protein             | 236         | YP_108089        | BPSL1467                                             | 31             | 5                | 68    | 8.85/4.47   | 17.0/16.3         |                                            |
| Uncharacterized proteins                         |             |                  |                                                      |                |                  |       |             |                   |                                            |
| Uncharacterized lipoprotein                      | 237         | ZP_01249570      | BPSS1506                                             | 45             | 10               | 109   | 7.21/5.86   | 22.8/24.7         |                                            |
| Uncharacterized lipoprotein                      | 238         | ZP_01317860      | BPSS1849                                             | 36             | 3                | 73    | 4.94/4.19   | 14.3/16.0         |                                            |
| Limonene-1,2-epoxide hydrolase                   | 239         | YP_110153        | BPSS0132                                             | 48             | 7                | 122   | 6.43/4.78   | 14.8/11.6         |                                            |
| NADPH-dependent FMN reductase                    | 240         | YP_112348        | BPSS2346                                             | 40             | 6                | 127   | 6.51/6.32   | 20.3/18.0         |                                            |
| L-2-Amino-thiazoline-4-carboxylic acid hydrolase | 241         | ZP_00442057      | BPSS0857                                             | 75             | 15               | 176   | 5.53/4.91   | 21.0/18.2         |                                            |
| Family C56 unassigned peptidase                  | 242         | YP_106014        | BPSS0719                                             | 46             | 9                | 149   | 4.72/4.70   | 23.9/24.5         |                                            |
| Short-chain dehydrogenase                        | 243         | YP_109355        | BPSL2759                                             | 60             | 12               | 183   | 5.74/6.07   | 26.3/25.7         |                                            |
| Ankyrin repeat protein                           | 244         | ZP_01331343      | BPSL1440                                             | 81             | 19               | 208   | 6.43/5.87   | 23.5/22.2         |                                            |
| gp30                                             | 245         | AAO46033         | BPSS0387                                             | 32             | 11               | 127   | 5.54/5.91   | 40.5/46.0         |                                            |
| Hypothetical proteins                            |             |                  |                                                      |                |                  |       |             |                   |                                            |
| Hypothetical protein                             | 246         | ZP_01328746      | BPSL0086                                             | 55             | 10               | 152   | 5.12/4.12   | 17.3/16.2         |                                            |
| Hypothetical protein                             | 247         | YP_106730        | BPSL0104                                             | 23             | 3                | 66    | 4.48/4.52   | 20.0/19.2         |                                            |
| Hypothetical protein                             | 248         | YP_106975        | BPSL0348                                             | 59             | 13               | 169   | 6.59/4.52   | 28.0/23.2         |                                            |
| Hypothetical protein                             | 249         | YP_106975        | BPSL0348                                             | 53             | 10               | 149   | 6.59/4.45   | 28.0/22.8         |                                            |
| Hypothetical protein                             | 250         | YP_106975        | BPSL0348                                             | 64             | 18               | 227   | 6.59/4.53   | 28.0/22.7         |                                            |
| Hypothetical protein                             | 251         | YP_106975        | BPSL0348                                             | 47             | 10               | 151   | 6.59/4.57   | 28.0/22.8         |                                            |
| Hypothetical protein                             | 252         | YP_106976        | BPSL0349                                             | 47             | 9                | 111   | 5.04/4.75   | 20.3/19.4         |                                            |
| Hypothetical protein                             | 253         | YP_106976        | BPSL0349                                             | 75             | 13               | 182   | 5.04/4.96   | 20.3/18.9         |                                            |
| Hypothetical protein                             | 254         | YP_107036        | BPSL0410                                             | 77             | 9                | 131   | 5.30/5.29   | 11.4/15.2         |                                            |
| Hypothetical protein                             | 255         | YP_107228        | BPSL0599                                             | 55             | 5                | 99    | 4.94/4.93   | 13.9/15.8         |                                            |
| Hypothetical protein                             | 256         | YP_107492        | BPSL0867                                             | 67             | 16               | 166   | 9.17/4.46   | 18.0/16.5         |                                            |
| Hypothetical protein                             | 257         | YP_107677        | BPSL1050                                             | 37             | 4                | 76    | 6.14/5.36   | 13.9/21.2         |                                            |
| Hypothetical protein                             | 258         | AAU50278         | BPSL1067                                             | 38             | 5                | 65    | 6.54/7.00   | 14.5/15.3         |                                            |
| Hypothetical protein                             | 259         | YP_107996        | BPSL1371                                             | 51             | 12               | 115   | 9.94/6.06   | 20.4/22.0         |                                            |
| Hypothetical protein                             | 260         | YP_108169        | BPSL1549                                             | 30             | 5                | 79    | 5.14/4.98   | 23.4/22.7         | [41]                                       |
| Hypothetical protein                             | 261         | YP_108169        | BPSL1549                                             | 68             | 12               | 159   | 5.14/5.13   | 23.4/21.5         |                                            |
| Hypothetical protein                             | 262         | YP_108169        | BPSL1549                                             | 44             | 7                | 97    | 5.14/4.99   | 23.4/36.8         |                                            |
| Hypothetical protein                             | 263         | YP_108201        | BPSL1581                                             | 61             | 17               | 144   | 5.19/4.98   | 15.4/16.9         |                                            |
| Hypothetical protein                             | 264         | ZP_01213142      | BPSL1601                                             | 63             | 10               | 151   | 5.61/4.70   | 15.0/14.6         |                                            |
| Hypothetical protein                             | 265         | YP_333132        | BPSL2082                                             | 76             | 17               | 196   | 9.60/5.28   | 18.0/28.0         |                                            |
| Hypothetical protein                             | 266         | YP_109607        | BPSL3012                                             | 55             | 11               | 128   | 6.14/5.20   | 29.0/40.8         |                                            |
| Hypothetical protein                             | 267         | YP_110039        | BPSS0015                                             | 78             | 10               | 152   | 10.47/4.92  | 17.2/32.2         |                                            |
| Hypothetical protein                             | 268         | YP_110050        | BPSS0026                                             | 42             | 13               | 141   | 8.22/4.65   | 30.9/23.1         |                                            |
| Hypothetical protein                             | 269         | YP_110232        | BPSS0212                                             | 41             | 9                | 109   | 5.34/5.34   | 22.5/22.5         |                                            |
| Hypothetical protein                             | 270         | YP_110233        | BPSS0213                                             | 51             | 13               | 141   | 6.65/4.36   | 21.7/22.1         |                                            |
| Hypothetical protein                             | 271         | YP_110696        | BPSS0683                                             | 55             | 8                | 107   | 5.09/5.00   | 13.1/14.4         |                                            |
| Hypothetical protein                             | 272         | YP_110726        | BPSS0712                                             | 66             | 7                | 110   | 6.18/5.70   | 13.9/13.6         |                                            |
| Hypothetical protein                             | 273         | YP_110895        | BPSS0886                                             | 53             | 9                | 114   | 5.89/5.84   | 15.9/15.0         |                                            |
| Hypothetical protein                             | 274         | YP_110940        | BPSS0931                                             | 26             | 9                | 111   | 9.30/5.17   | 30.0/36.2         |                                            |
| Hypothetical protein                             | 275         | YP_337721        | BPSS0961                                             | 25             | 9                | 83    | 5.05/4.56   | 18.3/23.1         |                                            |
| Hypothetical protein                             | 276         | YP_111111        | BPSS1098                                             | 58             | 6                | 103   | 4.57/4.68   | 9.90/12.5         |                                            |
| Hypothetical protein                             | 277         | YP_105479        | BPSS1486                                             | 63             | 6                | 120   | 5.12/4.75   | 16.2/15.0         |                                            |
| Hypothetical protein                             | 278         | ZP_00489981      | BPSS1506                                             | 30             | 12               | 117   | 7.21/6.01   | 22.8/24.8         |                                            |
| Hypothetical protein                             | 279         | YP_111596        | BPSS1588                                             | 20             | 7                | 74    | 6.18/6.04   | 49.5/49.5         |                                            |
| Hypothetical protein                             | 280         | AAO46033         | BPSS1923                                             | 42             | 5                | 80    | 5.52/5.26   | 14.2/46.2         |                                            |
| Hypothetical protein                             | 281         | ZP_01317823      | BPSS2055                                             | 30             | 13               | 129   | 5.22/5.13   | 25.1/22.3         |                                            |
| Hypothetical protein                             | 282         | ZP_01327194      | BPSS2129                                             | 28             | 5                | 83    | 5.63/5.91   | 20.2/18.3         |                                            |

<sup>a</sup> Gene abbreviations in the blankets within the biological metabolism categories are used for the metabolic pathways in Figure S4.

<sup>b</sup> Genes whose function has been reported to be involved in virulence are indicated by references.

- [1] Ferreira, A. S., Leitao, J. H., Sousa, S. A., Cosme, A. M., *et al.*, Functional analysis of Burkholderia cepacia genes bceD and bceF, encoding a phosphotyrosine phosphatase and a tyrosine autokinase, respectively: role in exopolysaccharide biosynthesis and biofilm formation. *Appl Environ Microbiol* 2007, *73*, 524-534.
- [2] Sobral, R. G., Jones, A. E., Des Etages, S. G., Dougherty, T. J., *et al.*, Extensive and genome-wide changes in the transcription profile of Staphylococcus aureus induced by modulating the transcription of the cell wall synthesis gene murF. *J Bacteriol* 2007, *189*, 2376-2391.
- [3] Bernardini, M. L., Sanna, M. G., Fontaine, A., Sansonetti, P. J., OmpC is involved in invasion of epithelial cells by Shigella flexneri. *Infect Immun* 1993, *61*, 3625-3635.
- [4] Metzger, M., Bellemann, P., Bugert, P., Geider, K., Genetics of galactose metabolism of Erwinia amylovora and its influence on polysaccharide synthesis and virulence of the fire blight pathogen. *J Bacteriol* 1994, *176*, 450-459.
- [5] Kikuchi, H., Kim, S., Watanabe, K., Watarai, M., Brucella abortus-d-alanyl-D-alanine carboxypeptidase contributes to its intracellular replication and resistance against nitric oxide. *FEMS Microbiol Lett* 2006, *259*, 120-125.
- [6] Weiser, J. N., Gotschlich, E. C., Outer membrane protein A (OmpA) contributes to serum resistance and pathogenicity of Escherichia coli K-1. *Infect Immun* 1991, *59*, 2252-2258.
- [7] Lemercier, G., Espiau, B., Ruiz, F. A., Vieira, M., *et al.*, A pyrophosphatase regulating polyphosphate metabolism in acidocalcisomes is essential for Trypanosoma brucei virulence in mice. *J Biol Chem* 2004, *279*, 3420-3425.
- [8] Chan, Y. Y., Chua, K. L., The Burkholderia pseudomallei BpeAB-OprB efflux pump: expression and impact on quorum sensing and virulence. *J Bacteriol* 2005, *187*, 4707-4719.
- [9] West, N. P., Jungnitz, H., Fitter, J. T., McArthur, J. D., *et al.*, Role of phosphoglucomutase of Bordetella bronchiseptica in lipopolysaccharide biosynthesis and virulence. *Infect Immun* 2000, *68*, 4673-4680.
- [10] Lu, G. T., Xie, J. R., Chen, L., Hu, J. R., *et al.*, Glyceraldehyde-3-phosphate dehydrogenase of Xanthomonas campestris pv. campestris is required for extracellular polysaccharide production and full virulence. *Microbiology* 2009, *155*, 1602-1612.
- [11] Trant, C. G., Lacerda, T. L., Carvalho, N. B., Azevedo, V., *et al.*, Brucella abortus phosphoglycerate kinase (pgk) mutant is highly attenuated and induces superior protection than vaccine strain 19 in immune compromised and immune competent mice. *Infect Immun* 2010.
- [12] Veiga-Malta, I., Duarte, M., Dinis, M., Tavares, D., *et al.*, Enolase from Streptococcus sobrinus is an immunosuppressive protein. *Cell Microbiol* 2004, *6*, 79-88.
- [13] Crimmins, G. T., Schelle, M. W., Herskovits, A. A., Ni, P. P., *et al.*, Listeria monocytogenes 6-Phosphogluconolactonase mutants induce increased activation of a host cytosolic surveillance pathway. *Infect Immun* 2009, *77*, 3014-3022.
- [14] Murphy, H. N., Stewart, G. R., Mischenko, V. V., Apt, A. S., *et al.*, The OtsAB pathway is essential for trehalose biosynthesis in Mycobacterium tuberculosis. *J Biol Chem* 2005, *280*, 14524-14529.
- [15] Rodrigues, F., Sarkar-Tyson, M., Harding, S. V., Sim, S. H., *et al.*, Global map of growth-regulated gene expression in Burkholderia pseudomallei, the causative agent of melioidosis. *J Bacteriol* 2006, *188*, 8178-8188.
- [16] Gunel-Ozcan, A., Brown, K. A., Allen, A. G., Maskell, D. J., Salmonella typhimurium aroB mutants are attenuated in BALB/c mice. *Microb Pathog* 1997, *23*, 311-316.
- [17] Horzempa, J., O'Dee, D. M., Shanks, R. M., Nau, G. J., Francisella tularensis (Delta)pyrF shows that replication in non-macrophages is sufficient for pathogenesis in vivo. *Infect Immun* 2010.
- [18] Bucarey, S. A., Villagra, N. A., Martinic, M. P., Trombert, A. N., *et al.*, The Salmonella enterica serovar Typhi tsx gene, encoding a nucleoside-specific porin, is essential for prototrophic growth in the absence of nucleosides. *Infect Immun* 2005, *73*, 6210-6219.
- [19] Benjamin, W. H., Jr., Hall, P., Briles, D. E., A hemA mutation renders Salmonella typhimurium avirulent in mice, yet capable of eliciting protection against intravenous infection with S. typhimurium. *Microb Pathog* 1991, *11*, 289-295.
- [20] Han, T. K., Zhu, Z., Dao, M. L., Identification, molecular cloning, and sequence analysis of a deoxyribose aldolase in Streptococcus mutans GS-5. *Curr Microbiol* 2004, *48*, 230-236.
- [21] Sun, J., Wang, X., Lau, A., Liao, T. Y., *et al.*, Mycobacterial nucleoside diphosphate kinase blocks phagosome maturation in murine raw 264.7 macrophages. *PLoS One* 2010, *5*, e8769.
- [22] Kok, M., Buhlmann, E., Pechere, J. C., Salmonella typhimurium thyA mutants fail to grow intracellularly in vitro and are attenuated in mice. *Microbiology* 2001, *147*, 727-733.
- [23] Lu, G. T., Tang, Y. Q., Li, C. Y., Li, R. F., *et al.*, An adenosine kinase exists in Xanthomonas campestris pathovar campestris and is involved in extracellular polysaccharide production, cell motility, and virulence. *J Bacteriol* 2009, *191*, 3639-3648.
- [24] Smith, R. S., Wolfgang, M. C., Lory, S., An adenylate cyclase-controlled signaling network regulates Pseudomonas aeruginosa virulence in a mouse model of acute pneumonia. *Infect Immun* 2004, *72*, 1677-1684.
- [25] Givaudan, A., Lanois, A., flhDC, the flagellar master operon of Xenorhabdus nematophilus: requirement for motility, lipolysis, extracellular hemolysis, and full virulence in insects. *J Bacteriol* 2000, *182*, 107-115.
- [26] Kunert, A., Losse, J., Gruszyn, C., Huhn, M., *et al.*, Immune evasion of the human pathogen Pseudomonas aeruginosa: elongation factor Tuf is a factor H and plasminogen binding protein. *J Immunol* 2007, *179*, 2979-2988.

- [27] Fernebro, J., Blomberg, C., Morfeldt, E., Wolf-Watz, H., *et al.*, The influence of in vitro fitness defects on pneumococcal ability to colonize and to cause invasive disease. *BMC Microbiol* 2008, **8**, 65.
- [28] Takaya, A., Tomoyasu, T., Matsui, H., Yamamoto, T., The DnaK/DnaJ chaperone machinery of *Salmonella enterica* serovar Typhimurium is essential for invasion of epithelial cells and survival within macrophages, leading to systemic infection. *Infect Immun* 2004, **72**, 1364-1373.
- [29] Hennequin, C., Porcheray, F., Waligora-Dupriet, A., Collignon, A., *et al.*, GroEL (Hsp60) of *Clostridium difficile* is involved in cell adherence. *Microbiology* 2001, **147**, 87-96.
- [30] Himpsl, S. D., Lockatell, C. V., Hebel, J. R., Johnson, D. E., Mobley, H. L., Identification of virulence determinants in uropathogenic *Proteus mirabilis* using signature-tagged mutagenesis. *J Med Microbiol* 2008, **57**, 1068-1078.
- [31] Bjur, E., Eriksson-Ygberg, S., Aslund, F., Rhen, M., Thioredoxin 1 promotes intracellular replication and virulence of *Salmonella enterica* serovar Typhimurium. *Infect Immun* 2006, **74**, 5140-5151.
- [32] Jaeger, T., Budde, H., Flohe, L., Menge, U., *et al.*, Multiple thioredoxin-mediated routes to detoxify hydroperoxides in *Mycobacterium tuberculosis*. *Arch Biochem Biophys* 2004, **423**, 182-191.
- [33] Loughlin, M. F., Arandhara, V., Okolie, C., Aldsworth, T. G., Jenks, P. J., *Helicobacter pylori* mutants defective in the clpP ATP-dependant protease and the chaperone clpA display reduced macrophage and murine survival. *Microb Pathog* 2009, **46**, 53-57.
- [34] Bigot, A., Pagniez, H., Botton, E., Frehel, C., *et al.*, Role of FlIF and FlII of *Listeria monocytogenes* in flagellar assembly and pathogenicity. *Infect Immun* 2005, **73**, 5530-5539.
- [35] Sun, G. W., Chen, Y., Liu, Y., Tan, G. Y., *et al.*, Identification of a regulatory cascade controlling Type III Secretion System 3 gene expression in *Burkholderia pseudomallei*. *Mol Microbiol* 2010.
- [36] Suparak, S., Kespichayawattana, W., Haque, A., Easton, A., *et al.*, Multinucleated giant cell formation and apoptosis in infected host cells is mediated by *Burkholderia pseudomallei* type III secretion protein BipB. *J Bacteriol* 2005, **187**, 6556-6560.
- [37] Stevens, M. P., Haque, A., Atkins, T., Hill, J., *et al.*, Attenuated virulence and protective efficacy of a *Burkholderia pseudomallei* bsa type III secretion mutant in murine models of melioidosis. *Microbiology* 2004, **150**, 2669-2676.
- [38] Lim, S. H., So, B. H., Wang, J. C., Song, E. S., *et al.*, Functional analysis of pilQ gene in *Xanthomonas oryzae* pv. *oryzae*, bacterial blight pathogen of rice. *J Microbiol* 2008, **46**, 214-220.
- [39] Margolis, J. J., El-Etr, S., Joubert, L. M., Moore, E., *et al.*, Contributions of *Francisella tularensis* subsp. *novicida* chitinases and Sec secretion system to biofilm formation on chitin. *Appl Environ Microbiol* 2010, **76**, 596-608.
- [40] Ribardo, D. A., McIver, K. S., *amrA* encodes a putative membrane protein necessary for maximal exponential phase expression of the Mga virulence regulon in *Streptococcus pyogenes*. *Mol Microbiol* 2003, **50**, 673-685.
- [41] Wongtrakoongate, P., Mongkoldhumrongkul, N., Chaijan, S., Kamchonwongpaisan, S., Tungpradabkul, S., Comparative proteomic profiles and the potential markers between *Burkholderia pseudomallei* and *Burkholderia thailandensis*. *Mol Cell Probes* 2007, **21**, 81-91.
