# Supplementary material for: A Proteome Reference Map of the Causative Agent of Melioidosis Burkholderia pseudomallei
Source: Hindawi journal article supplement (doi:10.1155/2011/530926), 2011-01-01
Supplement: f6 [file 530926.f6.pdf]

**Table S2.** Protein isoforms identified in *Burkholderia pseudomallei* proteome reference map constructed under early stationary phase.

| Gene                                                            | Spot number | Accession number | % Seq coverage | Peptides matched | Score | Theo/exp pl | Theo/exp MW (kDa) |
|-----------------------------------------------------------------|-------------|------------------|----------------|------------------|-------|-------------|-------------------|
| Cell envelope biogenesis and outer membrane                     |             |                  |                |                  |       |             |                   |
| Phosphatidylethanolamine-binding protein                        | 10          | YP_107676        | 55             | 7                | 106   | 5.26/5.11   | 18.3/16.8         |
| Phosphatidylethanolamine-binding protein                        | 11          | YP_107676        | 47             | 7                | 106   | 5.26/4.72   | 18.3/13.7         |
| Energy metabolism                                               |             |                  |                |                  |       |             |                   |
| ATP synthase subunit B (AtpD)                                   | 15          | YP_109989        | 47             | 19               | 170   | 5.26/4.95   | 50.8/48.2         |
| ATP synthase subunit B (AtpD)                                   | 16          | YP_109989        | 36             | 12               | 118   | 5.26/5.08   | 50.8/48.4         |
| ATP synthase subunit B (AtpD)                                   | 17          | YP_109989        | 58             | 21               | 204   | 5.26/5.13   | 50.8/48.4         |
| Aldehyde dehydrogenase (NAD) family protein                     | 22          | ZP_00487209      | 64             | 24               | 251   | 5.46/5.55   | 50.7/49.1         |
| Aldehyde dehydrogenase (NAD) family protein                     | 23          | ZP_00487209      | 54             | 19               | 202   | 5.46/5.65   | 50.7/49.1         |
| Aldehyde dehydrogenase (NAD) family protein                     | 24          | ZP_00487209      | 66             | 26               | 275   | 5.46/5.86   | 50.7/49.2         |
| Malate dehydrogenase (Mdh)                                      | 29          | YP_106310        | 60             | 18               | 204   | 5.70/6.01   | 35.1/32.8         |
| Malate dehydrogenase (Mdh)                                      | 30          | YP_106310        | 56             | 18               | 208   | 5.70/4.46   | 35.1/32.2         |
| Phosphate acetyltransferase                                     | 36          | YP_111961        | 70             | 22               | 245   | 5.82/6.21   | 49.2/49.1         |
| Phosphate acetyltransferase                                     | 37          | YP_111961        | 29             | 10               | 145   | 5.82/6.31   | 49.2/29.1         |
| Inorganic pyrophosphatase (Ppa)                                 | 38          | YP_107649        | 72             | 23               | 304   | 5.37/5.25   | 19.2/21.0         |
| Inorganic pyrophosphatase (Ppa)                                 | 39          | YP_107649        | 36             | 9                | 125   | 5.37/5.02   | 19.2/20.8         |
| Carbohydrate metabolism                                         |             |                  |                |                  |       |             |                   |
| Glyceraldehyde 3-phosphate dehydrogenase (GapA)                 | 47          | YP_109546        | 58             | 13               | 164   | 6.37/4.47   | 36.3/34.9         |
| Glyceraldehyde 3-phosphate dehydrogenase (GapA)                 | 48          | YP_109546        | 85             | 25               | 282   | 6.37/6.70   | 36.3/37.0         |
| Phosphoglycerate kinase (Pgk)                                   | 49          | ZP_00895324      | 61             | 21               | 245   | 5.58/5.72   | 41.4/43.7         |
| Phosphoglycerate kinase (Pgk)                                   | 50          | ZP_00895324      | 50             | 21               | 242   | 5.58/5.18   | 41.4/28.9         |
| Phosphopyruvate hydratase (Eno)                                 | 51          | YP_108866        | 54             | 25               | 252   | 4.81/4.76   | 45.9/45.4         |
| Phosphopyruvate hydratase (Eno)                                 | 52          | YP_108866        | 24             | 9                | 98    | 4.81/4.78   | 45.9/45.4         |
| Lipid metabolism                                                |             |                  |                |                  |       |             |                   |
| Succinyl-CoA:3-ketoacid-coenzyme A transferase subunit A (ScoA) | 62          | YP_108553        | 50             | 11               | 143   | 5.56/5.89   | 25.4/25.2         |
| Succinyl-CoA:3-ketoacid-coenzyme A transferase subunit A (ScoA) | 63          | YP_108553        | 34             | 9                | 106   | 5.56/5.34   | 25.4/24.6         |
| Acetoacetyl-CoA reductase (PhbB)                                | 65          | ZP_00490574      | 35             | 8                | 120   | 6.07/6.00   | 25.3/25.7         |
| Acetoacetyl-CoA reductase (PhbB)                                | 66          | YP_111922        | 64             | 21               | 213   | 6.30/6.54   | 26.6/24.8         |
| Acyl-carrier-protein S-malonyltransferase (FabD)                | 68          | YP_109033        | 56             | 14               | 176   | 5.46/5.38   | 32.2/30.2         |
| Acyl-carrier-protein S-malonyltransferase (FabD)                | 69          | YP_107960        | 33             | 6                | 92    | 5.76/5.08   | 32.5/16.4         |
| Nucleotide metabolism                                           |             |                  |                |                  |       |             |                   |
| Deoxyribose-phosphate aldolase (DeoC)                           | 91          | ZP_00489036      | 34             | 7                | 90    | 5.42/5.28   | 27.1/27.7         |
| Deoxyribose-phosphate aldolase (DeoC)                           | 92          | YP_336226        | 87             | 20               | 249   | 5.42/5.53   | 27.2/27.2         |
| Secondary metabolite metabolism                                 |             |                  |                |                  |       |             |                   |
| Cytochrome P450                                                 | 103         | ZP_00440831      | 36             | 17               | 169   | 9.13/4.80   | 44.8/50.0         |
| Cytochrome P450                                                 | 104         | ZP_00486588      | 29             | 11               | 123   | 9.13/5.24   | 44.8/48.3         |
| Transcription                                                   |             |                  |                |                  |       |             |                   |
| Phage shock protein A                                           | 120         | YP_108702        | 62             | 20               | 166   | 5.11/4.97   | 24.5/25.9         |
| Phage shock protein A                                           | 121         | YP_108702        | 52             | 12               | 147   | 5.11/4.92   | 24.5/26.0         |
| Translation                                                     |             |                  |                |                  |       |             |                   |
| tRNA nucleotidyltransferase                                     | 133         | YP_106892        | 45             | 14               | 159   | 7.25/4.76   | 45.2/34.5         |

Table S2. Continued

| Gene                                                   | Spot number | Accession number | % Seq coverage | Peptides matched | Score | Theo/exp pl | Theo/exp MW (kDa) |
|--------------------------------------------------------|-------------|------------------|----------------|------------------|-------|-------------|-------------------|
| tRNA nucleotidyltransferase                            | 134         | YP_106892        | 44             | 12               | 139   | 7.25/5.23   | 45.2/38.0         |
| Elongation factor Tu (Tuf)                             | 135         | YP_109809        | 54             | 18               | 189   | 5.36/4.97   | 43.2/45.4         |
| Elongation factor Tu (Tuf)                             | 136         | YP_109809        | 50             | 15               | 143   | 5.36/4.10   | 43.2/44.2         |
| Elongation factor Tu (Tuf)                             | 137         | YP_109809        | 53             | 18               | 174   | 5.36/4.16   | 43.2/45.3         |
| Elongation factor Tu (Tuf)                             | 138         | YP_109809        | 67             | 24               | 209   | 5.36/4.68   | 43.2/44.3         |
| Elongation factor Tu (Tuf)                             | 139         | YP_109809        | 42             | 13               | 131   | 5.36/4.93   | 43.2/46.6         |
| Elongation factor Tu (Tuf)                             | 140         | ZP_01320582      | 35             | 9                | 139   | 5.18/4.94   | 40.3/38.6         |
| Elongation factor Ts (Tsf)                             | 141         | YP_108753        | 72             | 25               | 246   | 5.38/5.19   | 31.3/30.9         |
| Elongation factor Ts (Tsf)                             | 142         | YP_108753        | 59             | 21               | 216   | 5.38/5.08   | 31.3/31.4         |
| 30S ribosomal protein S9 (Rpsl)                        | 148         | YP_103901        | 66             | 6                | 121   | 10.65/4.13  | 14.3/16.0         |
| 30S ribosomal protein S9 (Rpsl)                        | 149         | YP_103901        | 66             | 10               | 98    | 10.65/4.27  | 14.3/16.0         |
| 50S ribosomal protein L4 RplD)                         | 151         | YP_109806        | 53             | 8                | 143   | 9.62/4.91   | 22.9/22.4         |
| 50S ribosomal protein L4 RplD)                         | 152         | YP_109806        | 66             | 11               | 149   | 9.62/5.02   | 22.9/22.3         |
| Post-translational modification                        |             |                  |                |                  |       |             |                   |
| Chaperonin GroEL                                       | 157         | AAO46033         | 67             | 41               | 121   | 5.18/4.95   | 56.5/57.2         |
| Chaperonin GroEL                                       | 158         | AAO46033         | 80             | 44               | 147   | 5.18/4.97   | 56.5/56.5         |
| Chaperonin GroEL                                       | 159         | AAO46033         | 77             | 46               | 166   | 5.18/5.00   | 56.5/56.5         |
| Chaperonin GroEL                                       | 160         | AAO46033         | 77             | 40               | 126   | 5.18/5.06   | 56.5/55.4         |
| Chaperonin GroES                                       | 161         | YP_109294        | 91             | 11               | 169   | 5.78/5.21   | 10.5/14.9         |
| Chaperonin GroES                                       | 162         | YP_109294        | 77             | 11               | 154   | 5.78/4.97   | 10.5/13.8         |
| Chaperonin GroES                                       | 163         | YP_109294        | 72             | 8                | 122   | 5.78/4.97   | 10.5/14.7         |
| Chaperonin GroES                                       | 164         | YP_109295        | 72             | 8                | 122   | 5.78/6.00   | 10.5/14.9         |
| HSP20/alpha crystallin family protein                  | 166         | YP_112291        | 76             | 9                | 145   | 5.14/5.00   | 16.0/15.8         |
| HSP20/alpha crystallin family protein                  | 167         | YP_112291        | 60             | 5                | 99    | 5.14/4.78   | 16.0/15.9         |
| HSP20/alpha crystallin family protein                  | 168         | YP_112291        | 76             | 9                | 148   | 5.14/5.00   | 16.0/16.3         |
| Peptidyl-prolyl cis-trans isomerase B (PpiB)           | 171         | ZP_01322808      | 45             | 8                | 92    | 6.20/6.02   | 15.6/19.1         |
| Peptidyl-prolyl cis-trans isomerase B (PpiB)           | 172         | YP_108841        | 68             | 18               | 210   | 5.94/6.39   | 17.9/19.2         |
| Peptidyl-prolyl cis-trans isomerase B (PpiB)           | 173         | YP_108841        | 65             | 12               | 161   | 5.94/6.55   | 17.9/19.4         |
| Peptidyl-prolyl cis-trans isomerase B (PpiB)           | 174         | YP_108841        | 69             | 16               | 210   | 5.94/6.28   | 17.9/19.5         |
| Peptidyl-prolyl cis-trans isomerase B (PpiB)           | 175         | YP_108841        | 69             | 16               | 194   | 5.94/6.18   | 17.9/19.2         |
| Glutathione S-transferase                              | 176         | YP_108349        | 50             | 9                | 120   | 6.99/6.67   | 26.7/28.9         |
| Glutathione S-transferase                              | 177         | YP_108349        | 38             | 9                | 104   | 6.99/6.53   | 26.7/22.9         |
| Cell motility, intracellular trafficking and secretion |             |                  |                |                  |       |             |                   |
| O-linked N-acetylglucosamine transferase               | 186         | ZP_01325544      | 48             | 26               | 184   | 5.75/5.16   | 63.7/63.6         |
| O-linked N-acetylglucosamine transferase               | 187         | ZP_01325544      | 57             | 34               | 115   | 5.75/5.25   | 63.7/63.4         |
| Chemotaxis protein CheW                                | 200         | ZP_01335516      | 46             | 6                | 97    | 4.99/5.05   | 16.9/13.9         |
| Chemotaxis protein CheW                                | 201         | ZP_01335516      | 54             | 8                | 115   | 4.99/4.99   | 16.9/13.9         |
| Stress responses                                       |             |                  |                |                  |       |             |                   |
| Phasin (PhaP)                                          | 212         | YP_108894        | 92             | 20               | 259   | 5.96/5.66   | 19.9/23.5         |
| Phasin (PhaP)                                          | 213         | YP_108894        | 88             | 17               | 214   | 5.96/5.86   | 19.9/23.6         |
| Phasin (PhaP)                                          | 214         | YP_108894        | 91             | 18               | 231   | 5.96/6.30   | 19.9/23.5         |
| Phasin (PhaP)                                          | 215         | YP_108894        | 59             | 9                | 159   | 5.96/5.13   | 19.9/15.4         |
| Phasin (PhaP)                                          | 216         | YP_108894        | 73             | 15               | 174   | 5.96/4.97   | 19.9/15.2         |
| Phasin (PhaP)                                          | 217         | YP_108894        | 74             | 11               | 196   | 5.96/4.90   | 19.9/15.3         |
| Phasin (PhaP)                                          | 218         | YP_108894        | 75             | 13               | 183   | 5.96/4.92   | 19.9/16.7         |
| Phasin (PhaP)                                          | 219         | YP_108894        | 73             | 14               | 185   | 5.96/4.92   | 19.9/16.3         |
| Phasin (PhaP)                                          | 220         | YP_108894        | 50             | 7                | 127   | 5.96/4.79   | 19.9/14.5         |
| Alkyl hydroperoxide reductase                          | 221         | ZP_00488820      | 68             | 12               | 179   | 5.02/4.94   | 19.1/18.1         |
| Alkyl hydroperoxide reductase                          | 222         | ZP_00488820      | 46             | 9                | 130   | 5.02/4.76   | 19.1/18.3         |
| Alkyl hydroperoxide reductase                          | 223         | ZP_00488820      | 50             | 7                | 104   | 5.02/4.70   | 19.1/13.3         |

**Table S2.** Continued

| Gene                                   | Spot number | Accession number | % Seq coverage | Peptides matched | Score | Theo/exp pI | Theo/exp MW (kDa) |
|----------------------------------------|-------------|------------------|----------------|------------------|-------|-------------|-------------------|
| Oxidoreductase                         | 225         | YP_109344        | 54             | 11               | 132   | 5.75/6.19   | 23.9/24.6         |
| Oxidoreductase                         | 226         | YP_109344        | 50             | 8                | 111   | 5.75/5.95   | 23.9/24.7         |
| Oxidoreductase                         | 227         | YP_109344        | 33             | 6                | 81    | 5.75/6.32   | 23.9/20.5         |
| Glyoxalase I                           | 229         | YP_110250        | 74             | 9                | 197   | 5.75/6.11   | 14.8/15.4         |
| Glyoxalase I                           | 230         | ZP_00485646      | 82             | 10               | 157   | 5.77/5.58   | 14.7/16.1         |
| Osmotically inducible Y domain protein | 232         | YP_336183        | 40             | 9                | 129   | 5.68/5.28   | 20.9/23.1         |
| Osmotically inducible Y domain protein | 233         | YP_336183        | 31             | 5                | 88    | 5.68/5.17   | 20.9/23.1         |
| Multidrug efflux pump                  | 234         | YP_108403        | 43             | 21               | 167   | 9.62/5.08   | 42.5/33.2         |
| Multidrug efflux pump                  | 235         | YP_108403        | 23             | 10               | 81    | 9.62/4.67   | 42.5/32.6         |
| Hypothetical proteins                  |             |                  |                |                  |       |             |                   |
| Hypothetical protein BPSL0348          | 248         | YP_106975        | 59             | 13               | 169   | 6.59/4.52   | 28.0/23.2         |
| Hypothetical protein BPSL0348          | 249         | YP_106975        | 53             | 10               | 149   | 6.59/4.45   | 28.0/22.8         |
| Hypothetical protein BPSL0348          | 250         | YP_106975        | 64             | 18               | 227   | 6.59/4.53   | 28.0/22.7         |
| Hypothetical protein BPSL0348          | 251         | YP_106975        | 47             | 10               | 151   | 6.59/4.57   | 28.0/22.8         |
| Hypothetical protein BPSL0349          | 252         | YP_106976        | 47             | 9                | 111   | 5.04/4.75   | 20.3/19.4         |
| Hypothetical protein BPSL0349          | 253         | YP_106976        | 75             | 13               | 182   | 5.04/4.96   | 20.3/18.9         |
| Hypothetical protein BPSL1549          | 260         | YP_108169        | 30             | 5                | 79    | 5.14/4.98   | 23.4/22.7         |
| Hypothetical protein BPSL1549          | 261         | YP_108169        | 68             | 12               | 159   | 5.14/5.13   | 23.4/21.5         |
| Hypothetical protein BPSL1549          | 262         | YP_108169        | 44             | 7                | 97    | 5.14/4.99   | 23.4/36.8         |
