# Supplementary figures and images for: A Proteome Reference Map of the Causative Agent of Melioidosis Burkholderia pseudomallei
Source: Hindawi journal article supplement (doi:10.1155/2011/530926), 2011-01-01

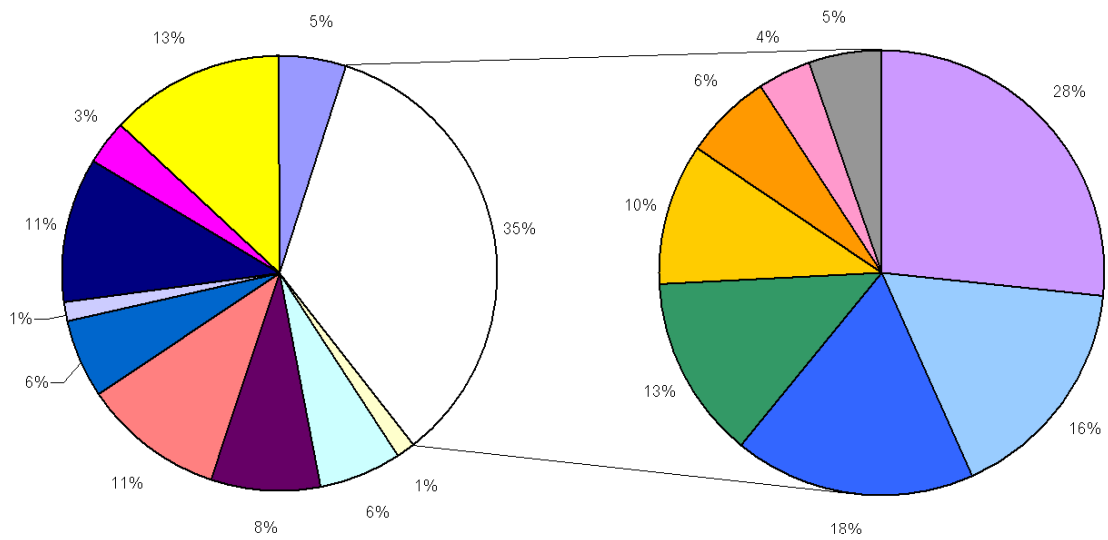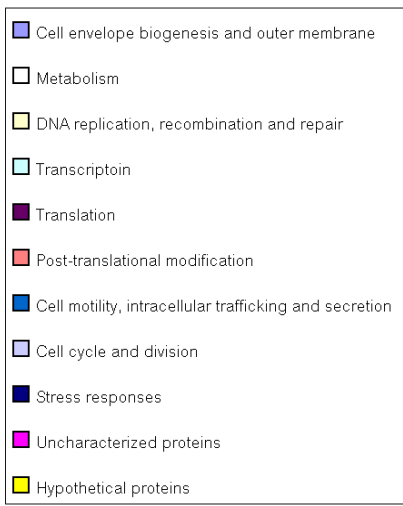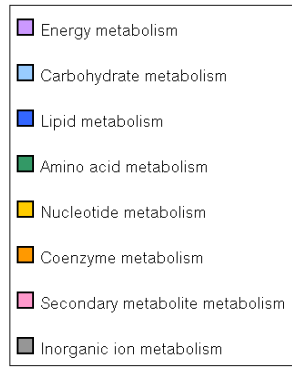

Supplement: f2 [file 530926.f2.pdf]

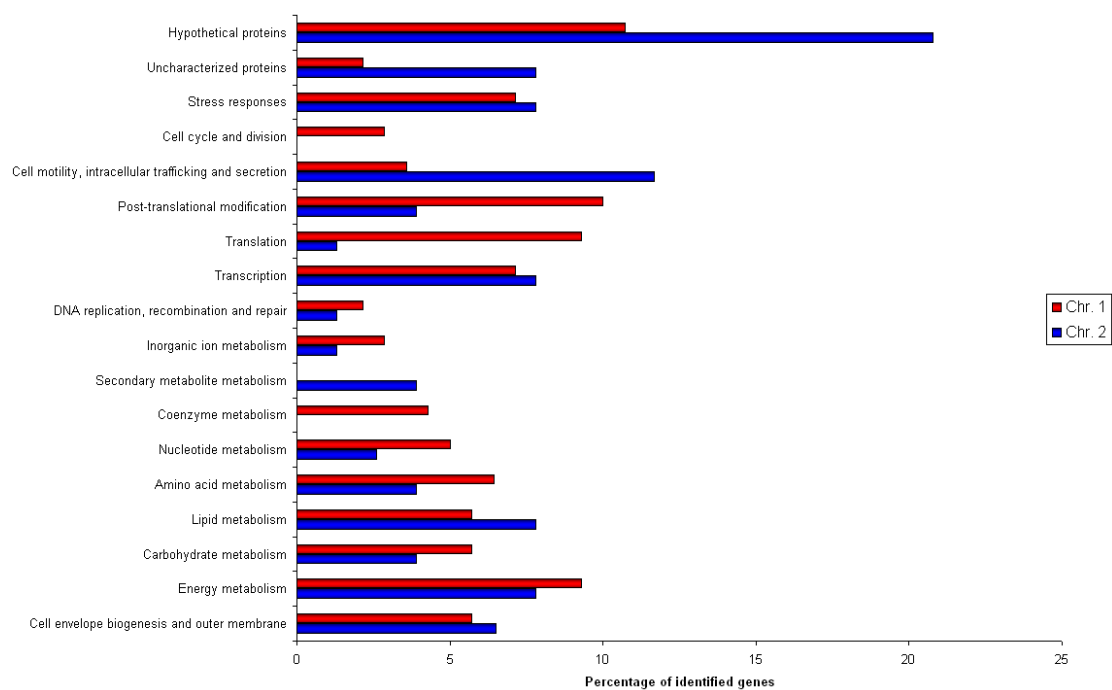

Supplement: f3 [file 530926.f3.pdf]

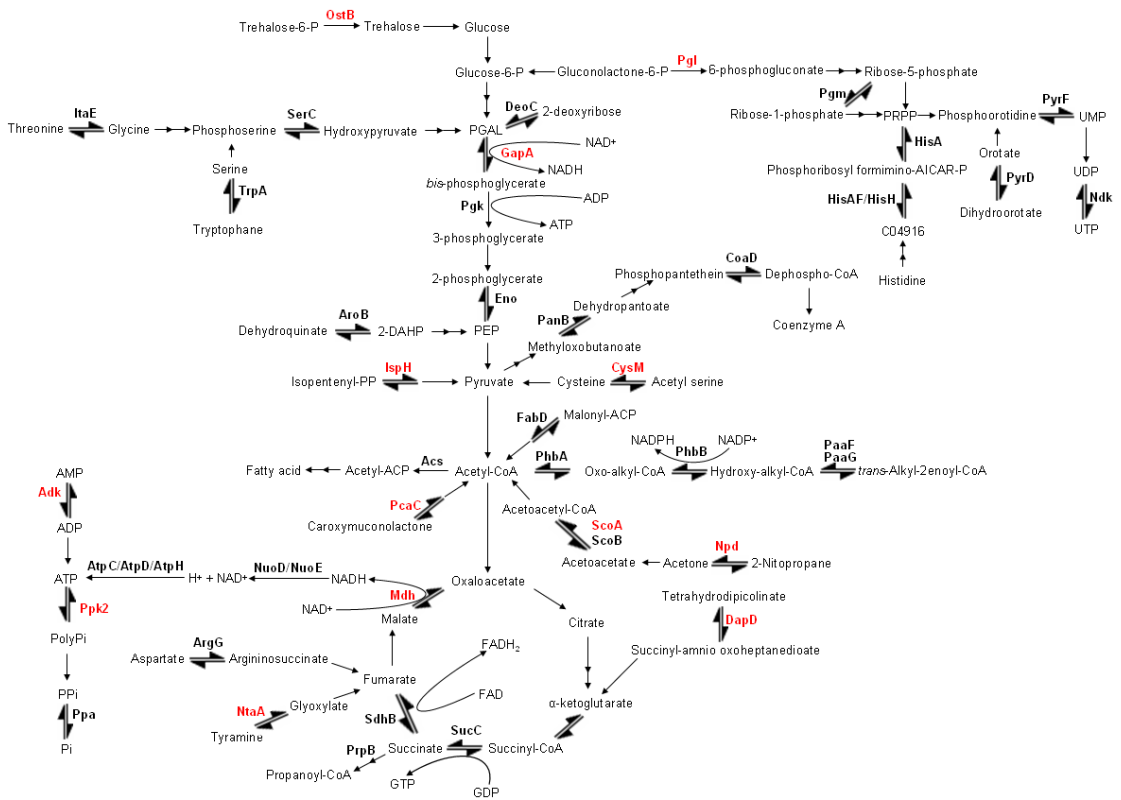

Supplement: f4 [file 530926.f4.pdf]
